# Supplementary material for: New Sulphated Flavonoids from Wissadula periplocifolia (L.) C. Presl (Malvaceae)
Source: PubMed Central journal article supplement (PMC6332353; doi:10.3390/molecules201119685), 2015-11-09
Supplement: molecules-20-19685-s001.pdf [file molecules-20-19685-s001.pdf]

# Supplementary Material: New Sulphated Flavonoids from *Wissadula periplocifolia* (L.) C. Presl (Malvaceae)

Yanna C. F. Teles, Carolina Campolina Rebello Horta, Maria de Fátima Agra, Weam Siheri, Marie Boyd, John O. Igoli, Alexander I. Gray, Maria de Fátima Vanderlei de Souza

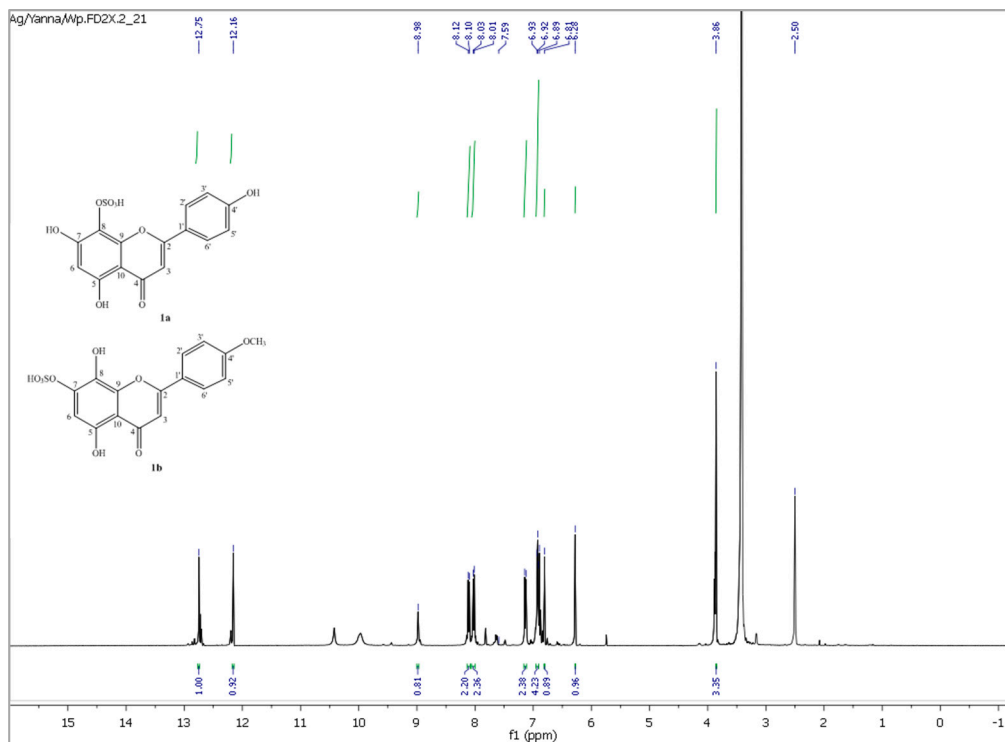

Figure S1.  $^1\text{H-NMR}$  spectrum (400 MHz, DMSO) of **1a** + **1b**.

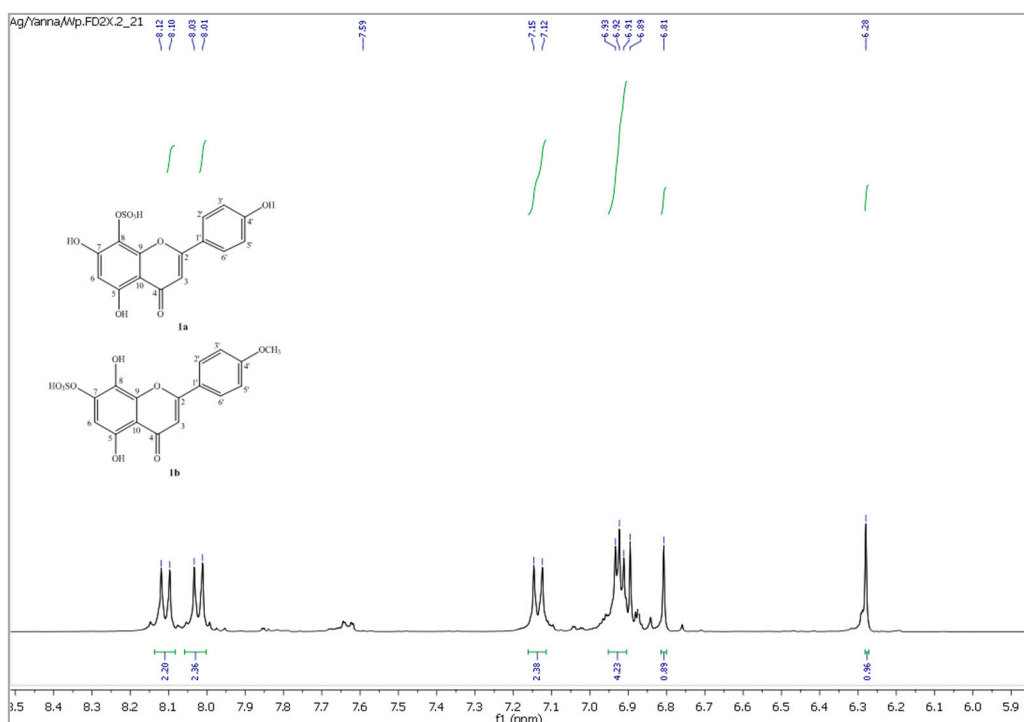

Figure S2. Expansion of  $^1\text{H-NMR}$  spectrum (400 MHz, DMSO) of **1a** + **1b**.

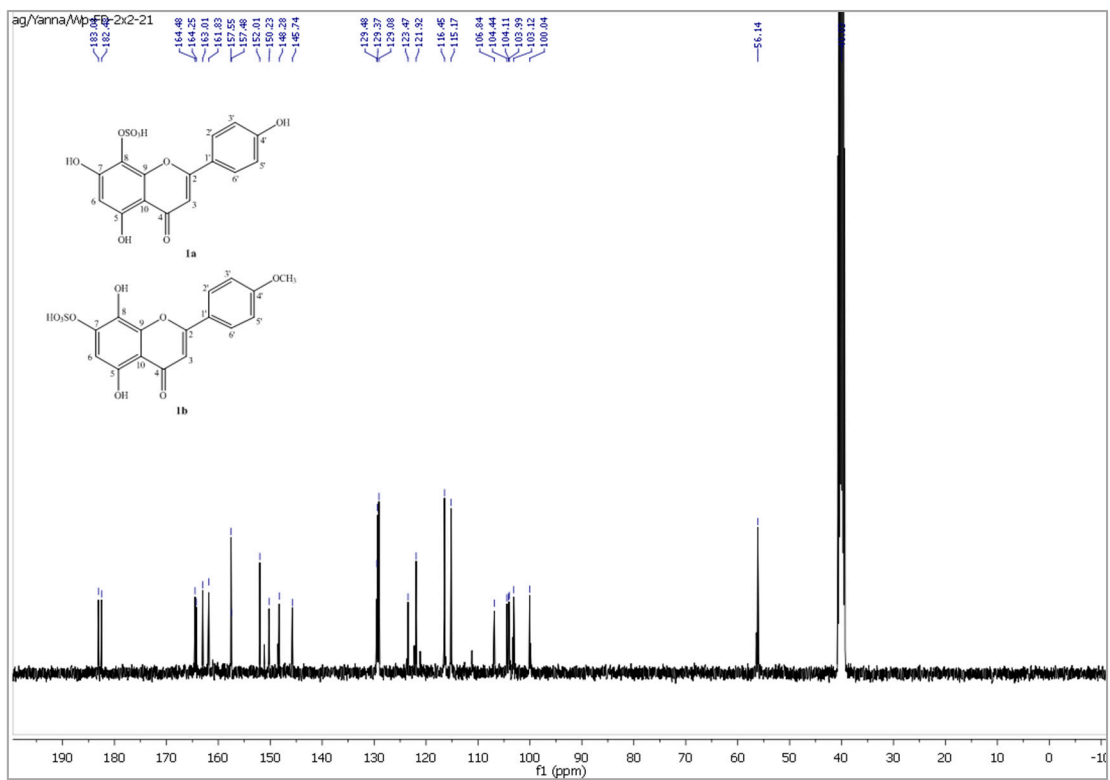

Figure S3.  $^{13}\text{C}$ -NMR spectrum (100 MHz, DMSO) of **1a** + **1b**.

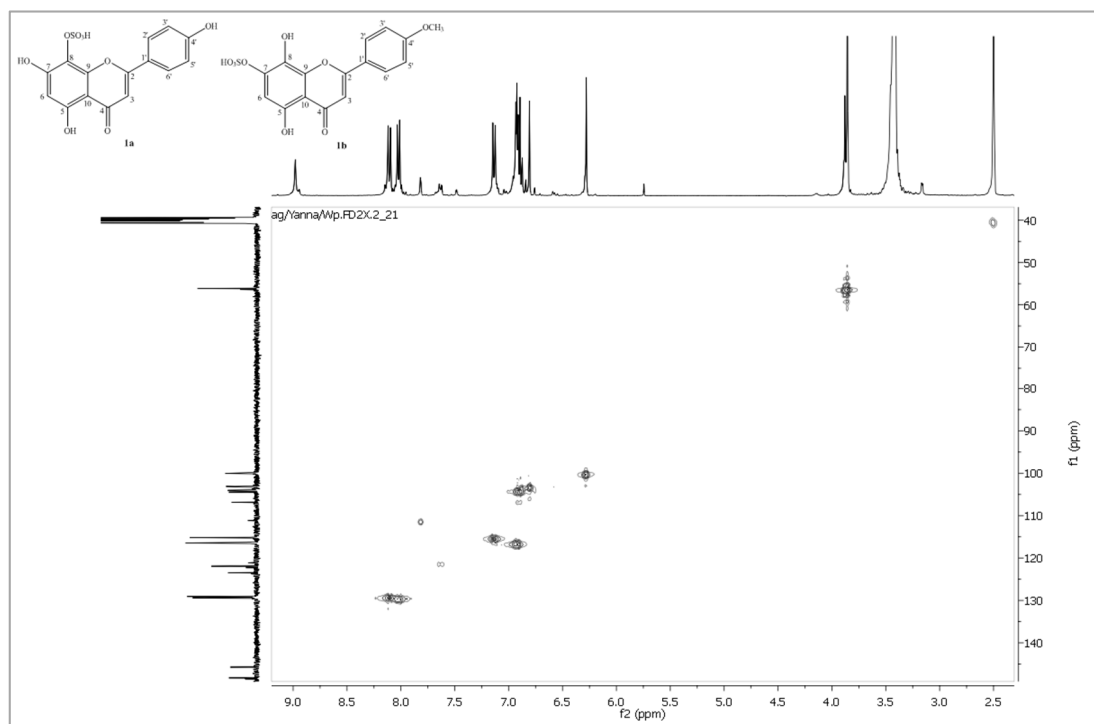

Figure S4. HMQC spectrum ( $^1\text{H}$ -NMR: 400 MHz,  $^{13}\text{C}$ -NMR: 100 MHz, DMSO) of **1a** + **1b**.

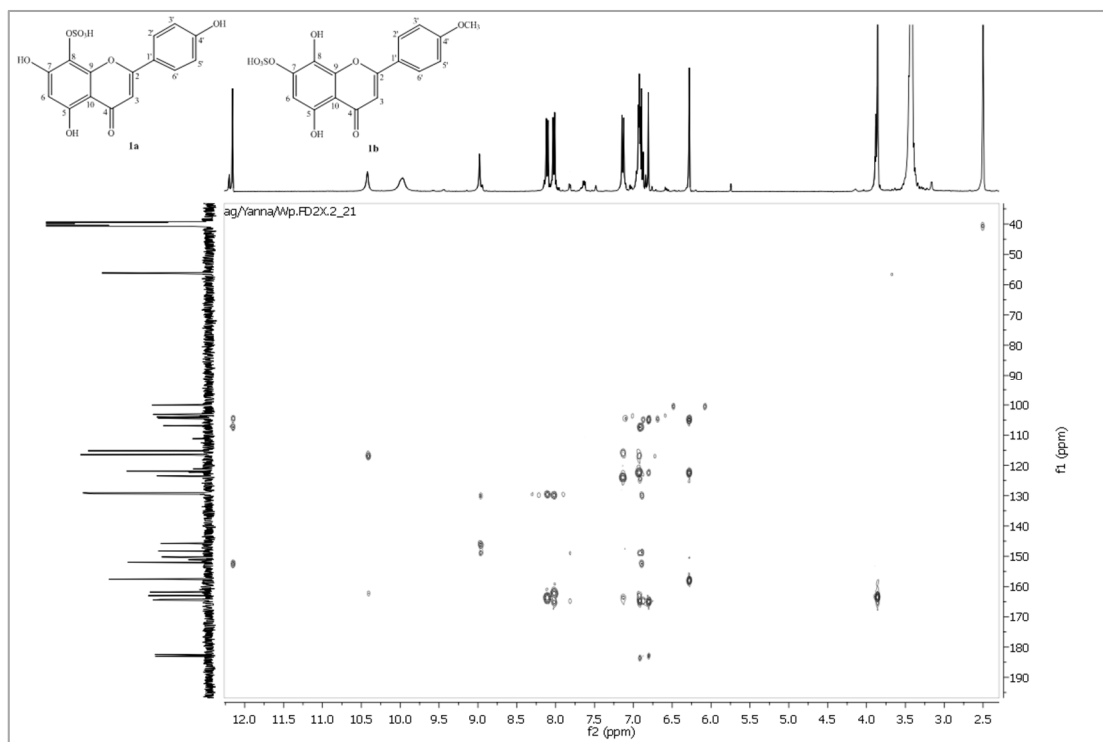

Figure S5. HMBC spectrum ( $^1\text{H-NMR}$ : 400 MHz,  $^{13}\text{C-NMR}$ : 100 MHz, DMSO) of **1a** + **1b**.

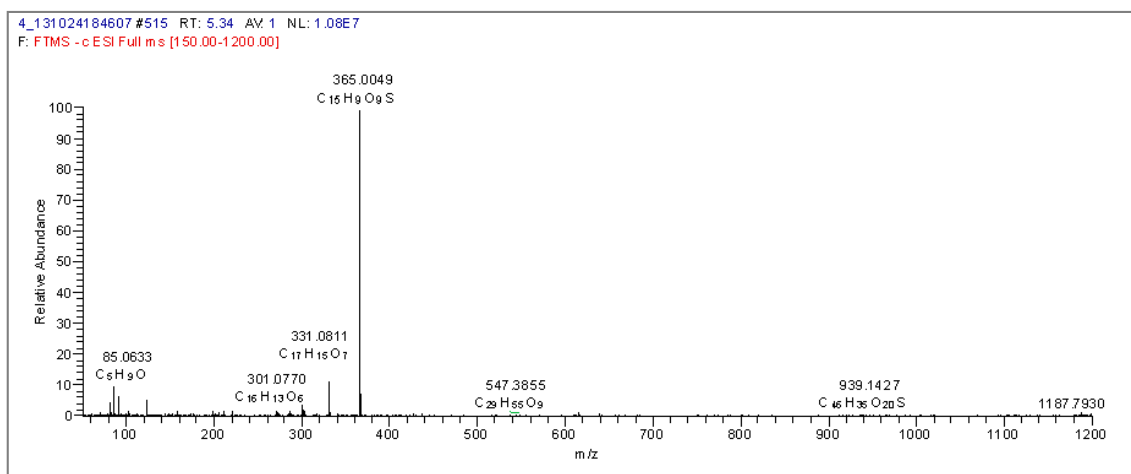

Figure S6. HRMS spectrum of compound **1a**.

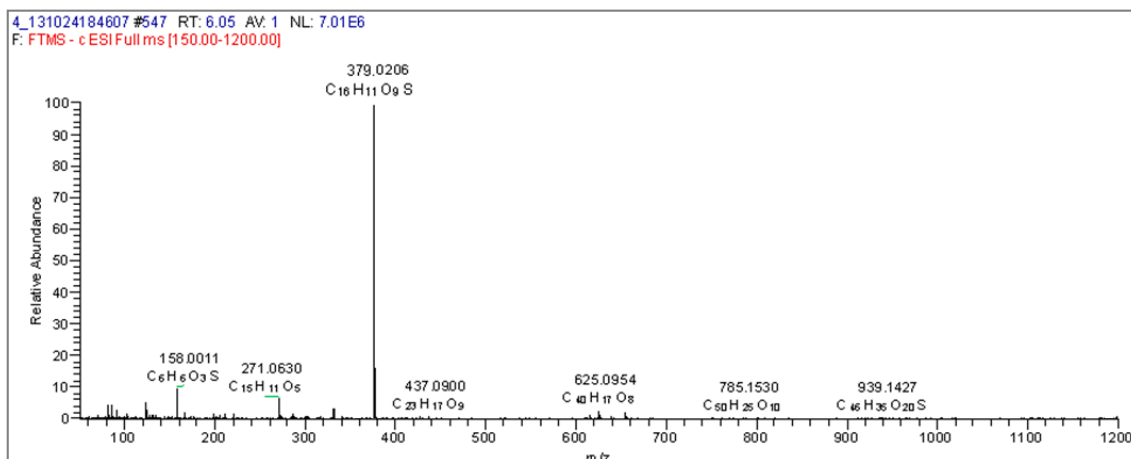

Figure S7. HRMS spectrum of compound **1b**.

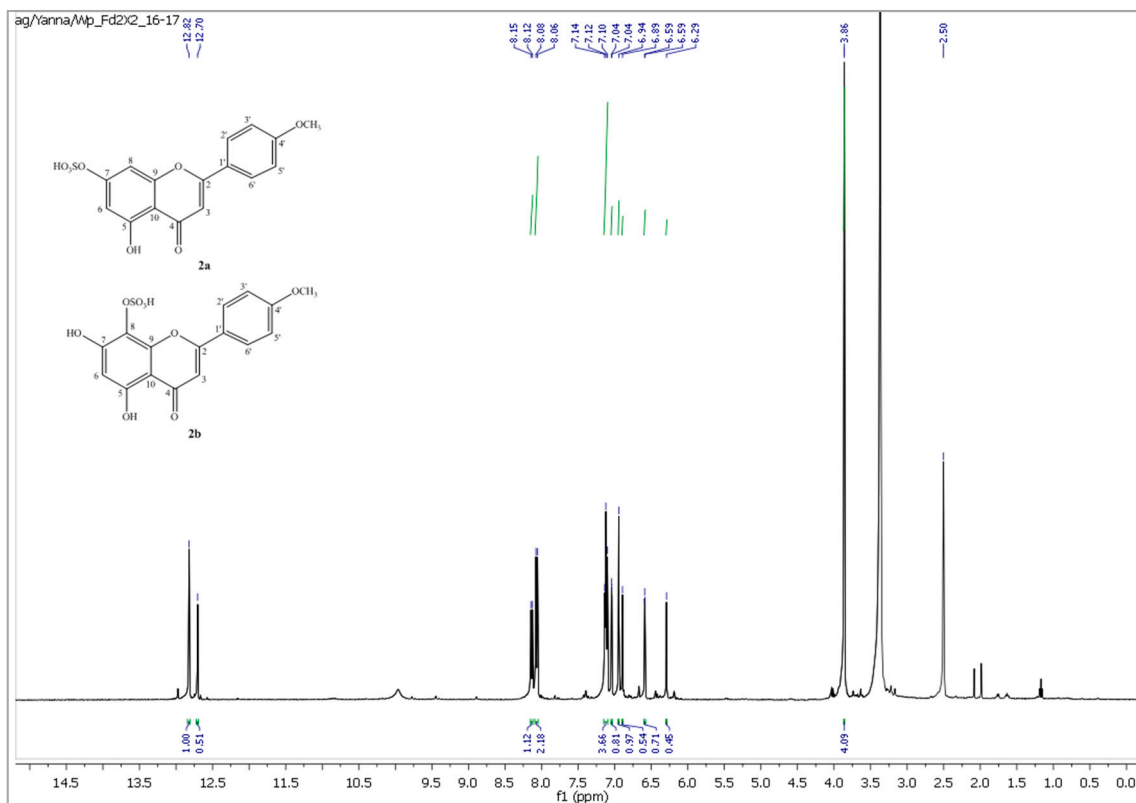

Figure S8.  $^1\text{H-NMR}$  spectrum (400 MHz, DMSO) of **2a** + **2b**.

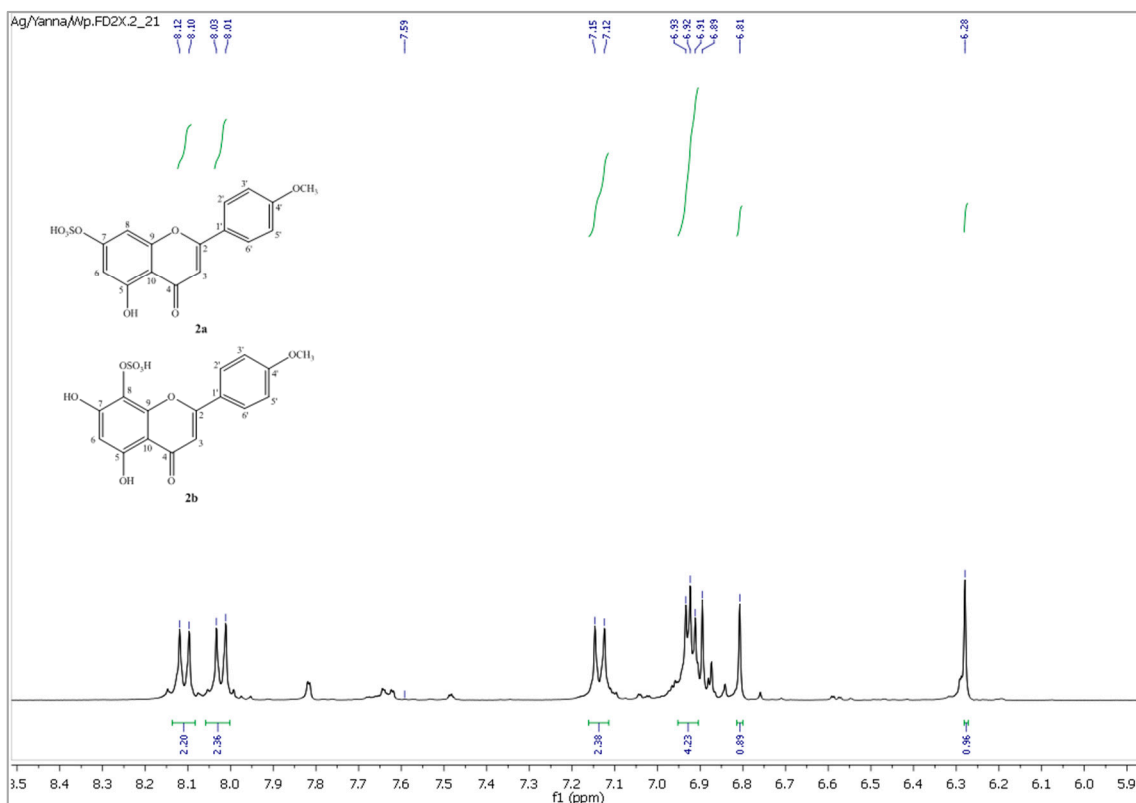

Figure S9. Expansion of  $^1\text{H-NMR}$  spectrum (400 MHz, DMSO) of **2a** + **2b**.

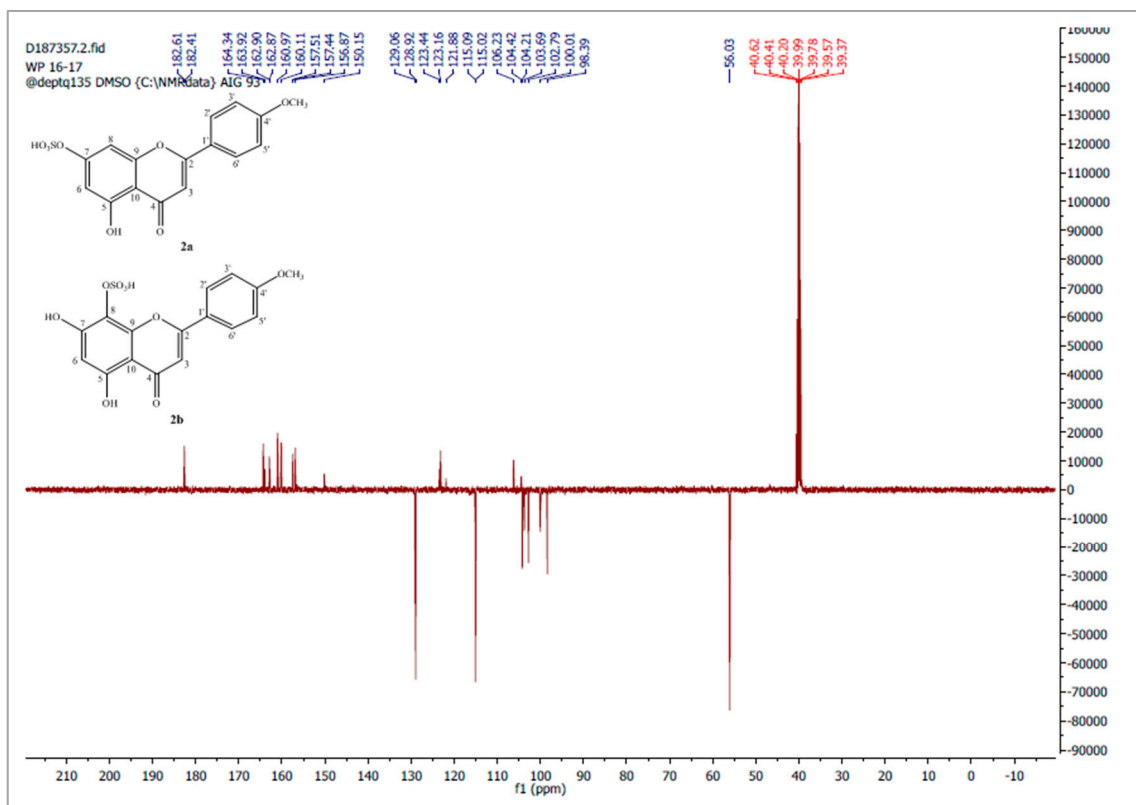

Figure S10.  $^{13}\text{C}$  DEPTQ-135 NMR spectrum (100 MHz, DMSO) of **2a** + **2b**.

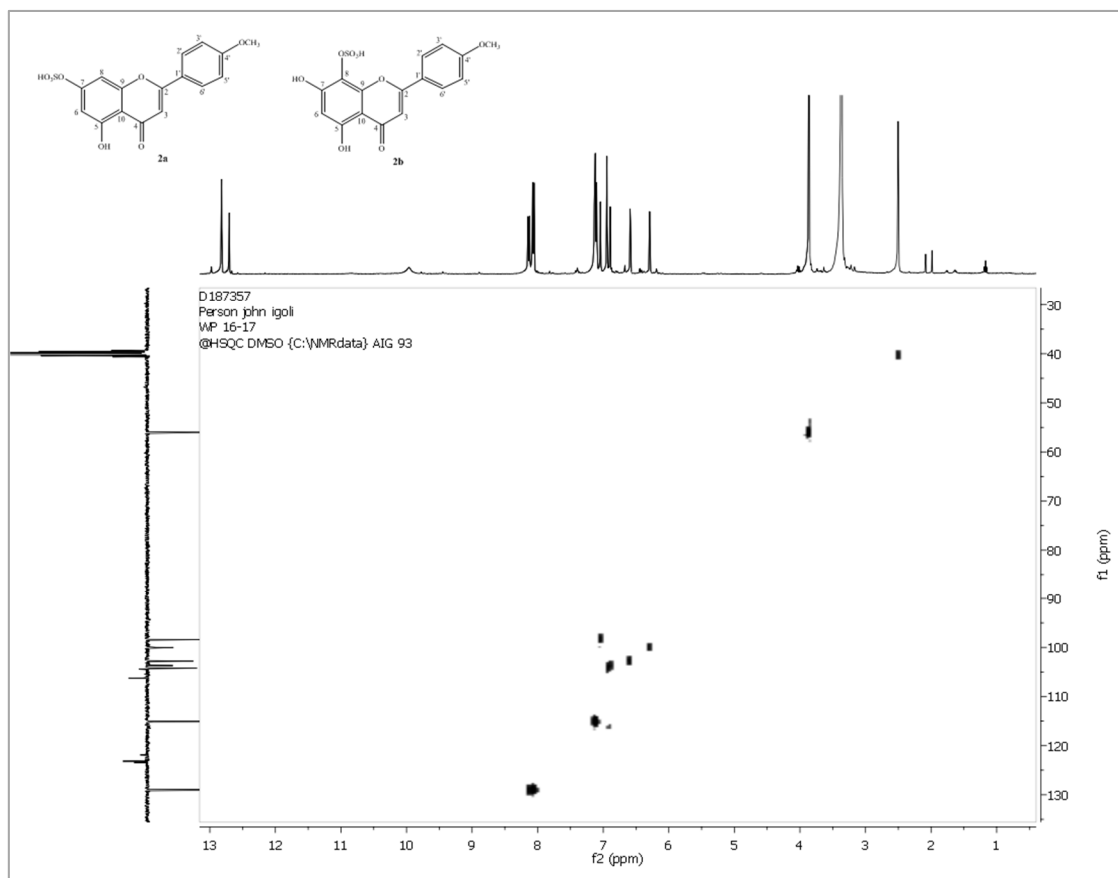

Figure S11. HSQC spectrum ( $^1\text{H}$ -NMR: 400 MHz,  $^{13}\text{C}$ -NMR: 100 MHz, DMSO) of **2a** + **2b**.

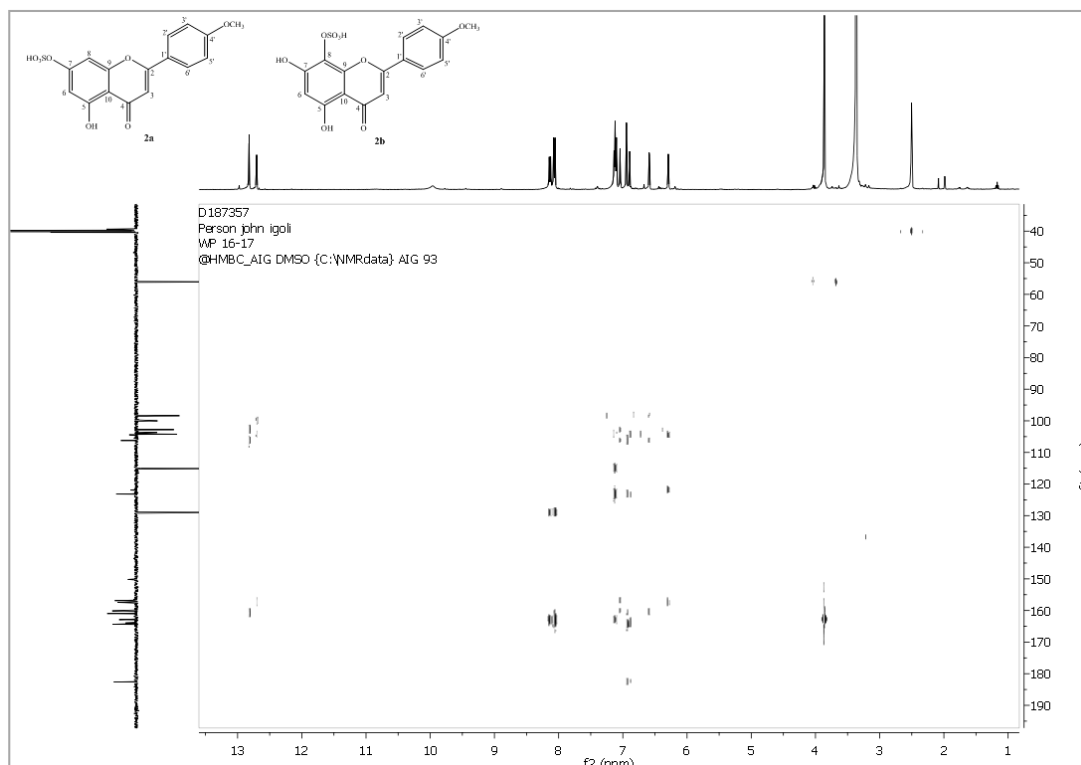

Figure S12. HMBC spectrum ( $^1\text{H-NMR}$ : 400 MHz,  $^{13}\text{C-NMR}$ : 100 MHz, DMSO) of **2a** + **2b**.

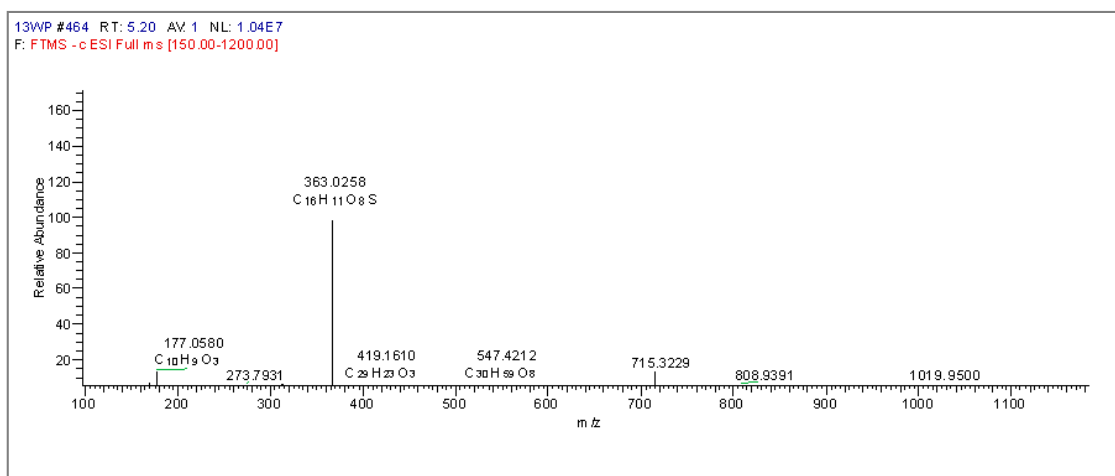

Figure S13. HRMS spectrum of compound **2a**.

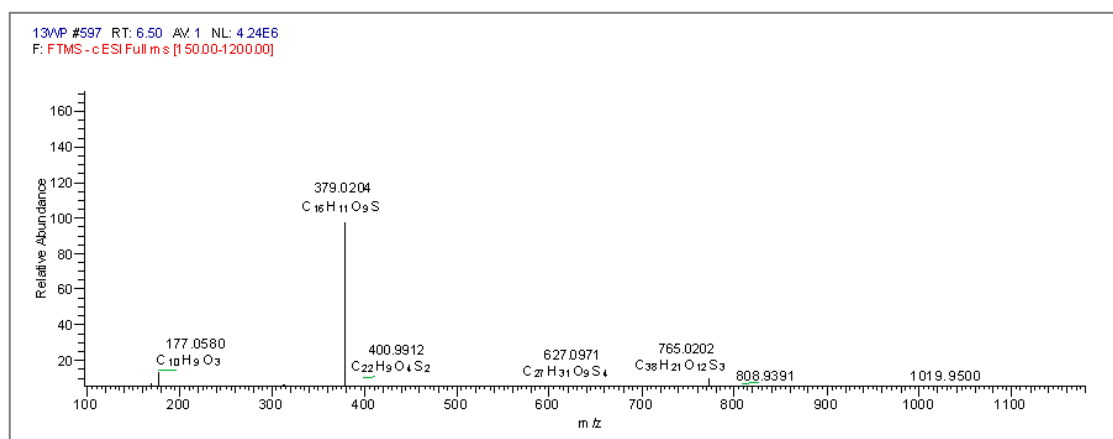

Figure S14. HRMS spectrum of compound **2b**.

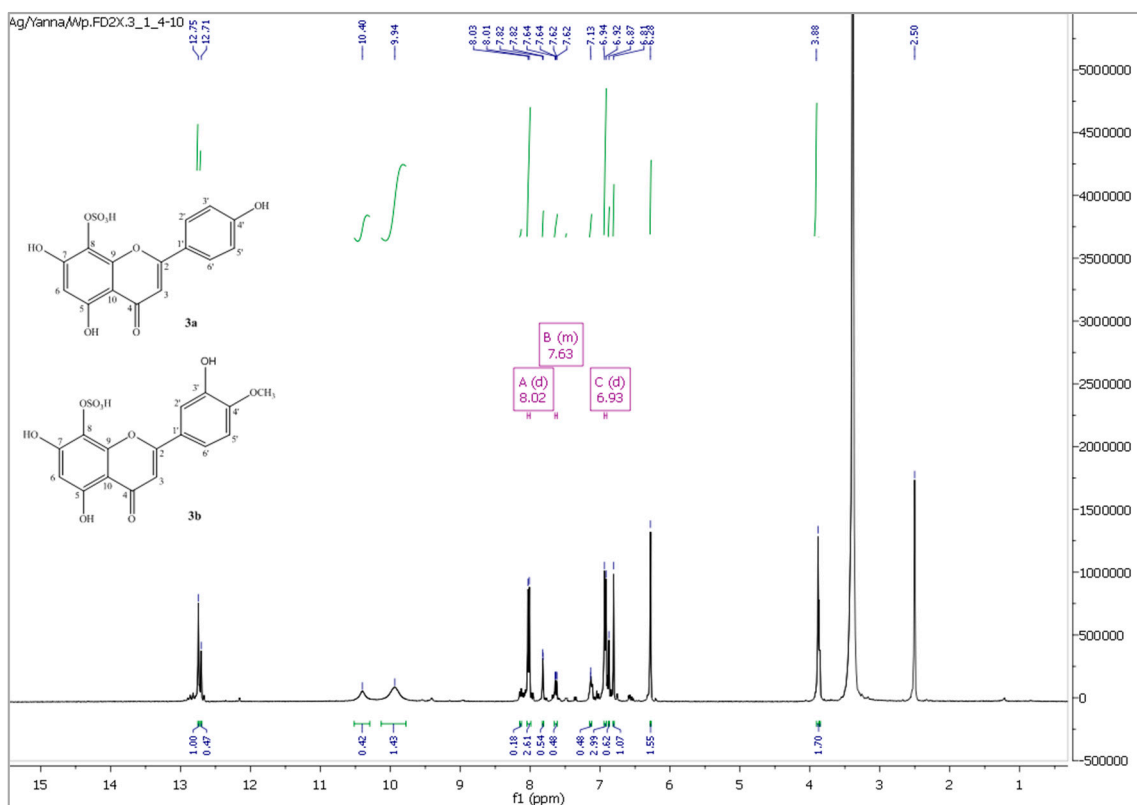

Figure S15.  $^1\text{H-NMR}$  spectrum (400 MHz, DMSO) spectrum of **3a** + **3b**.

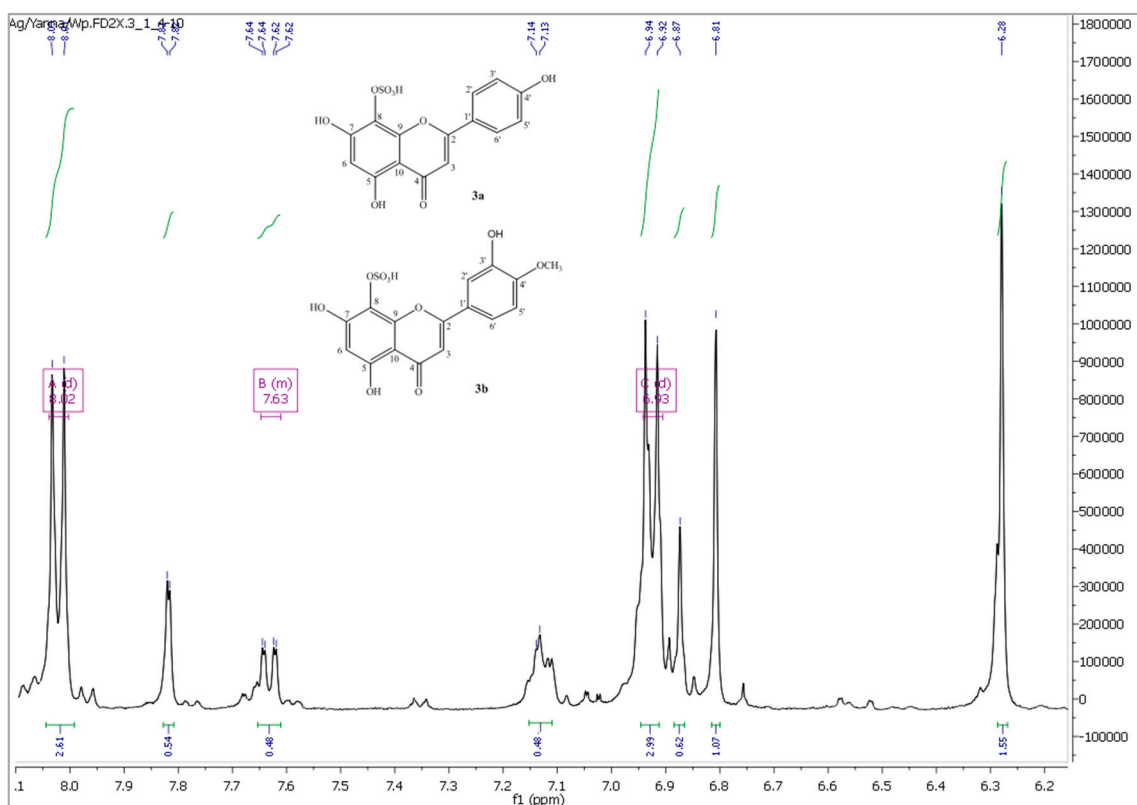

Figure S16. Expansion of  $^1\text{H-NMR}$  spectrum (400 MHz, DMSO) spectrum of **3a** + **3b**.

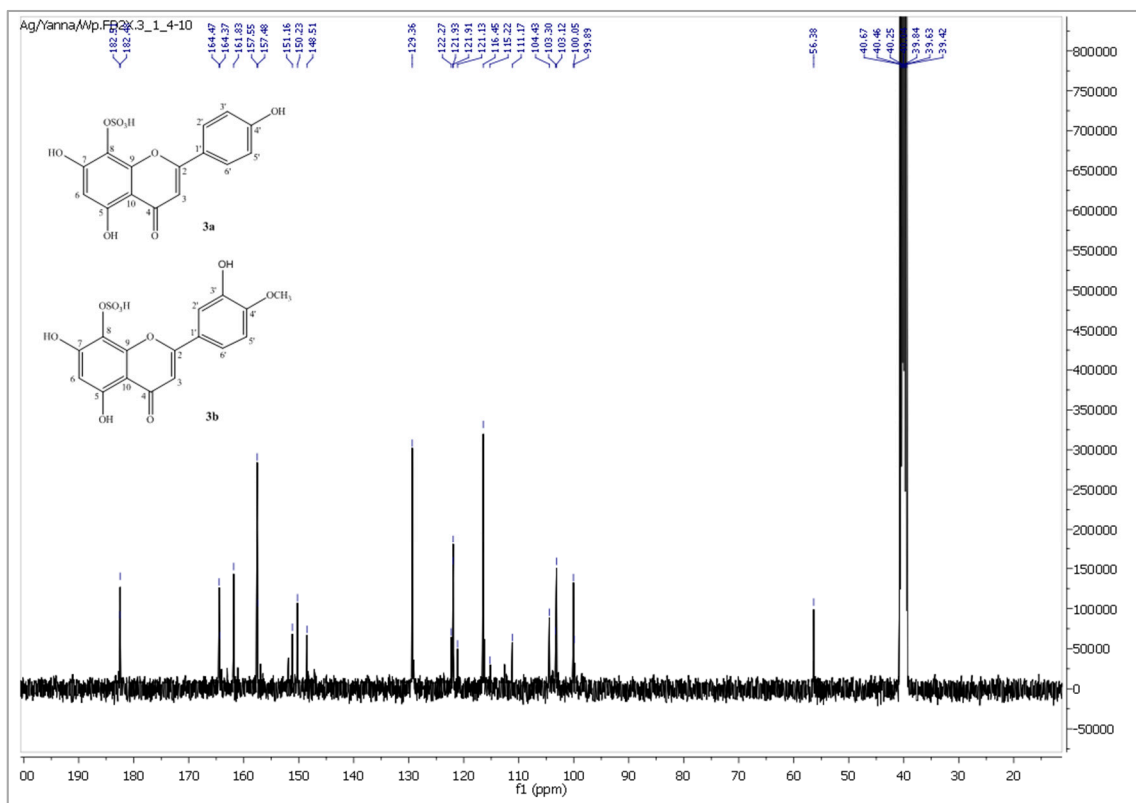

Figure S17.  $^{13}\text{C}$ -NMR spectrum (100 MHz, DMSO) spectrum of 3a + 3b.

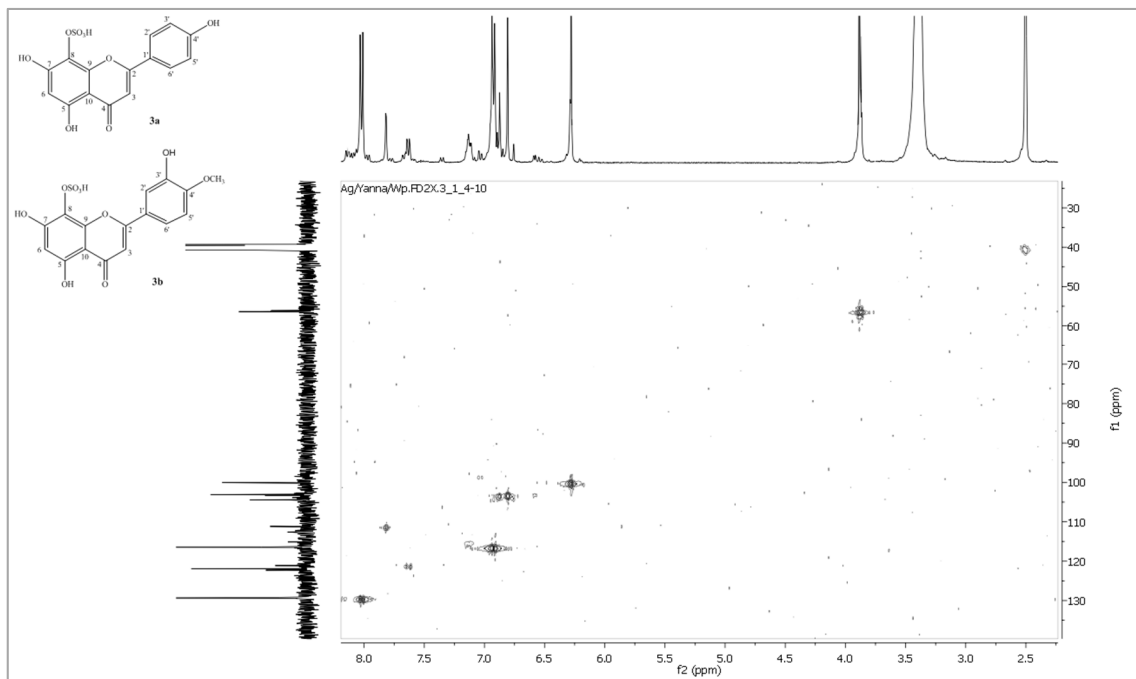

Figure S18. HSQC spectrum ( $^1\text{H}$ -NMR: 400 MHz,  $^{13}\text{C}$ -NMR: 100 MHz, DMSO) of 3a + 3b.



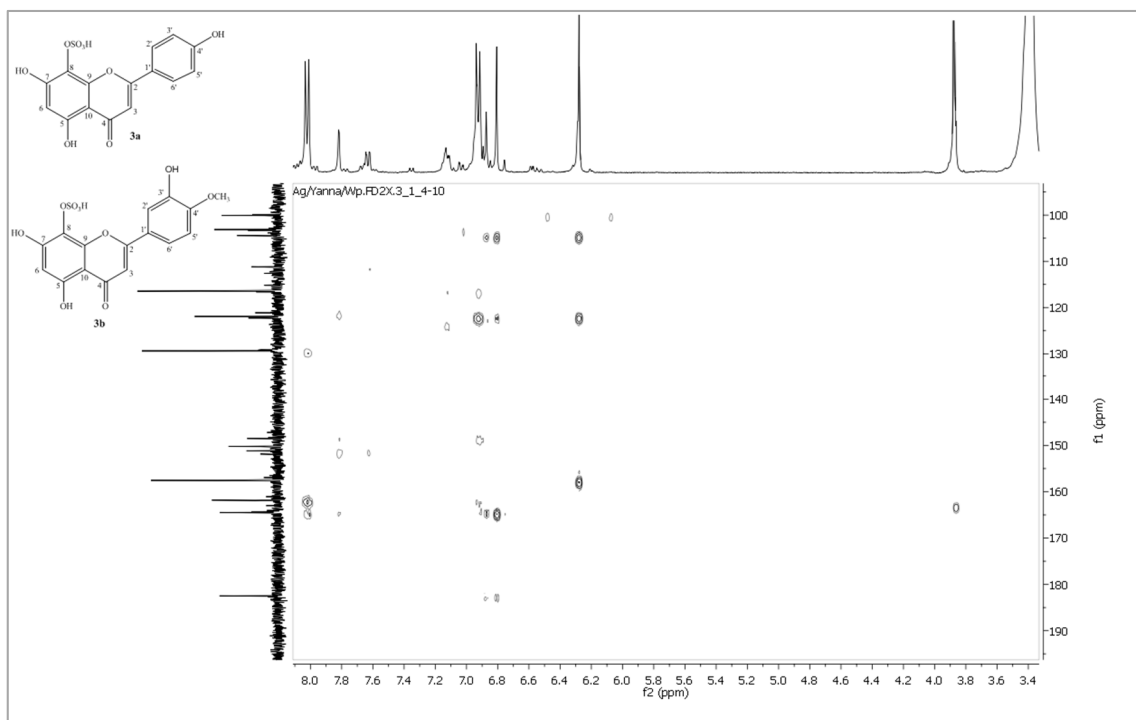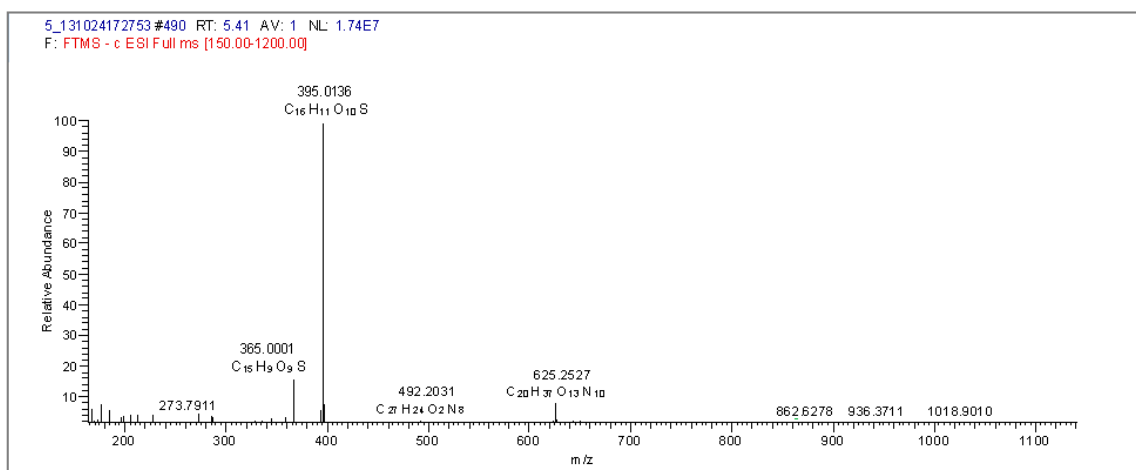

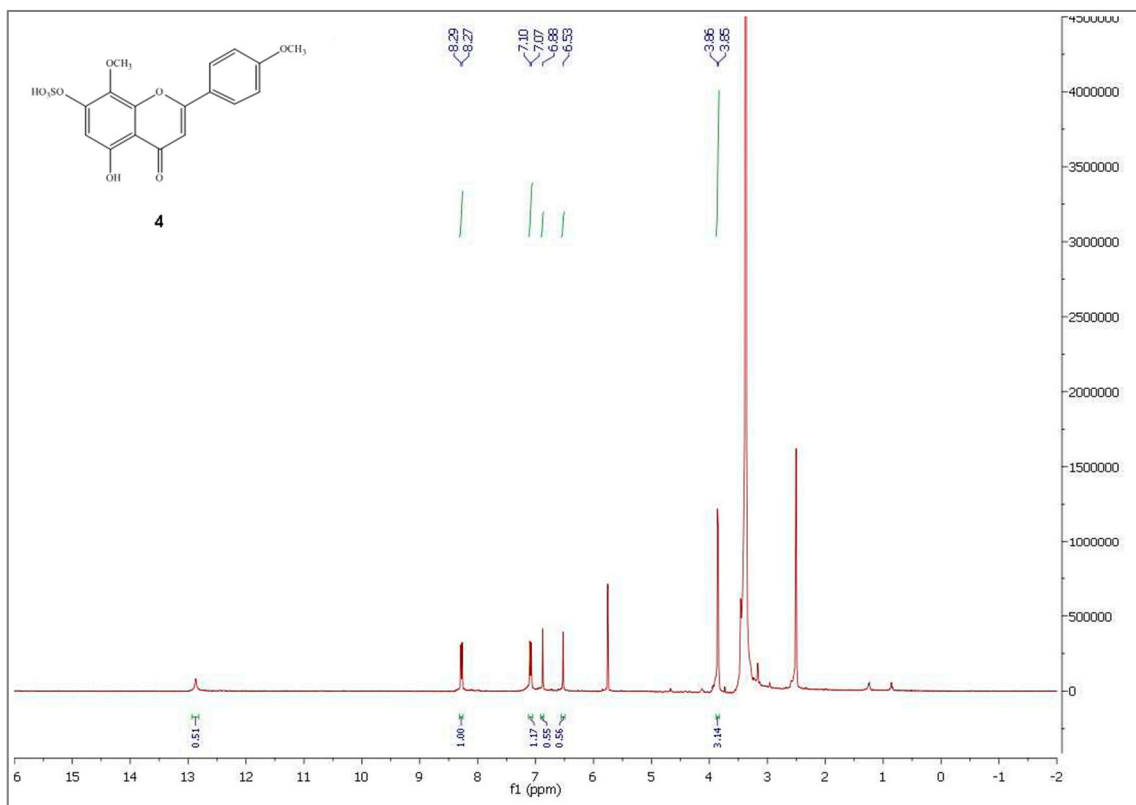

Figure S21.  $^1\text{H-NMR}$  spectrum (400 MHz, DMSO) spectrum of 4.

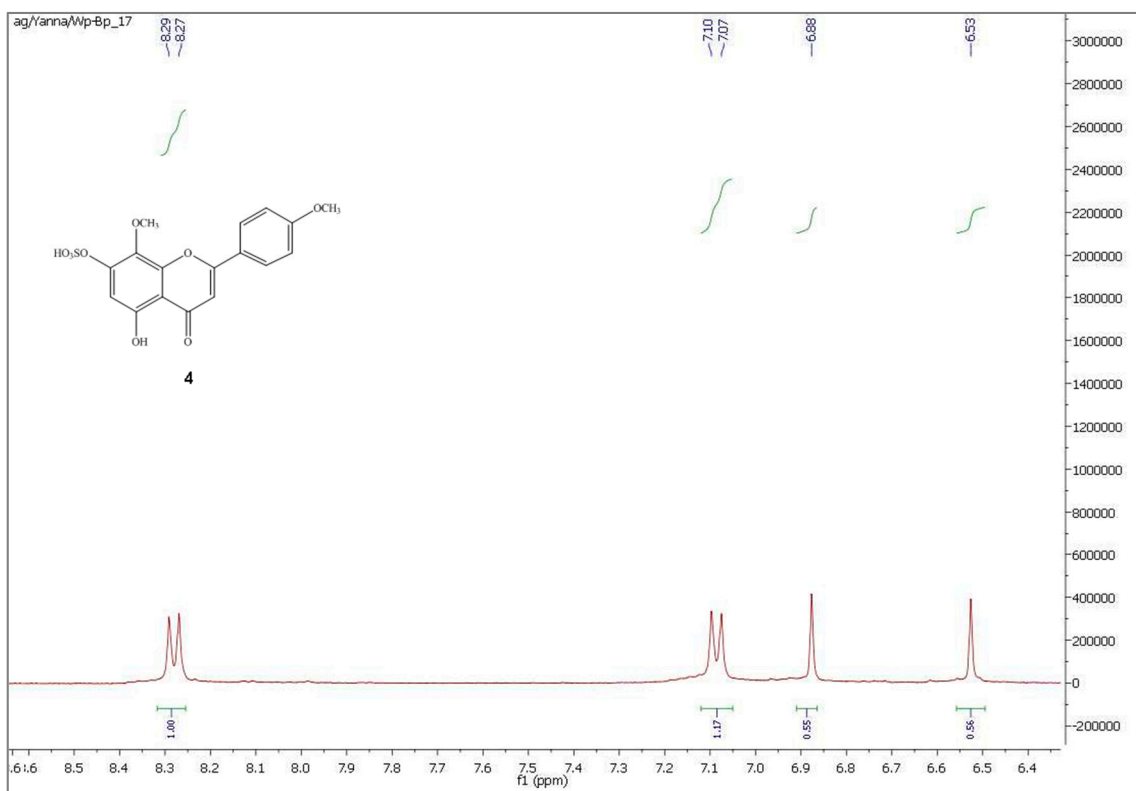

Figure S22. Expansion of  $^1\text{H-NMR}$  spectrum (400 MHz, DMSO) spectrum of 4.

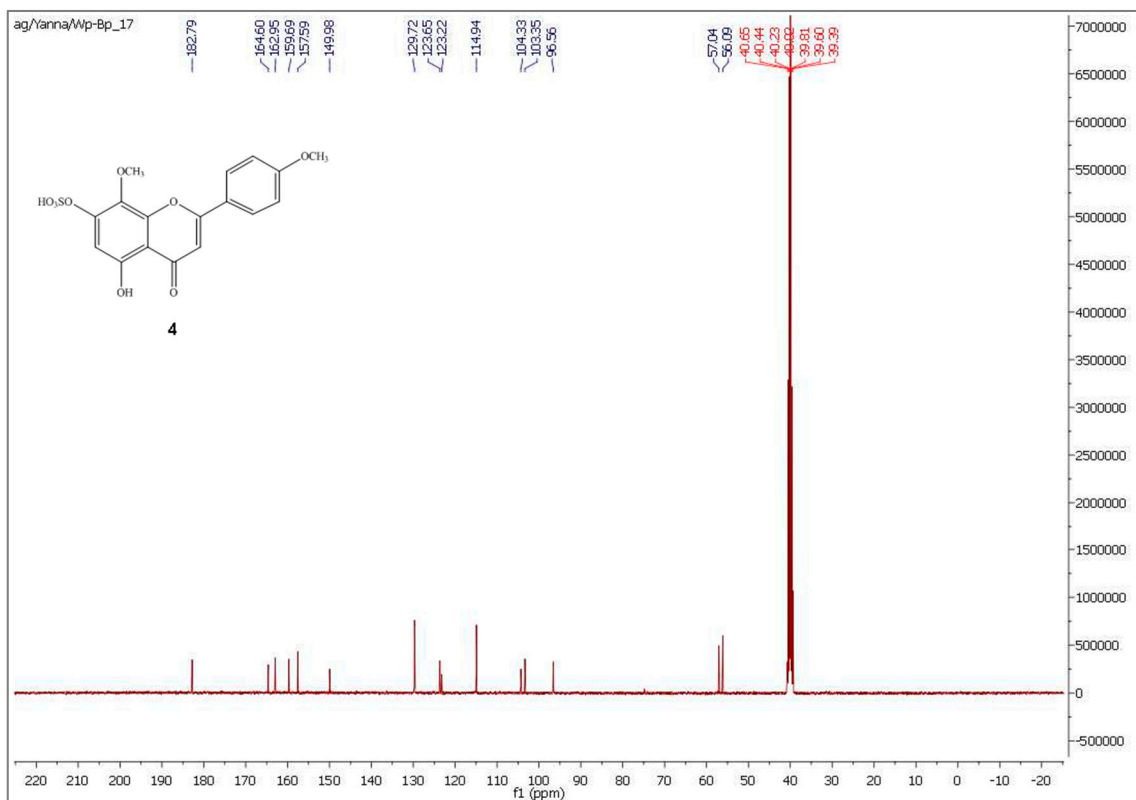

Figure S23. <sup>13</sup>C-NMR spectrum (100 MHz, DMSO) spectrum of 4.

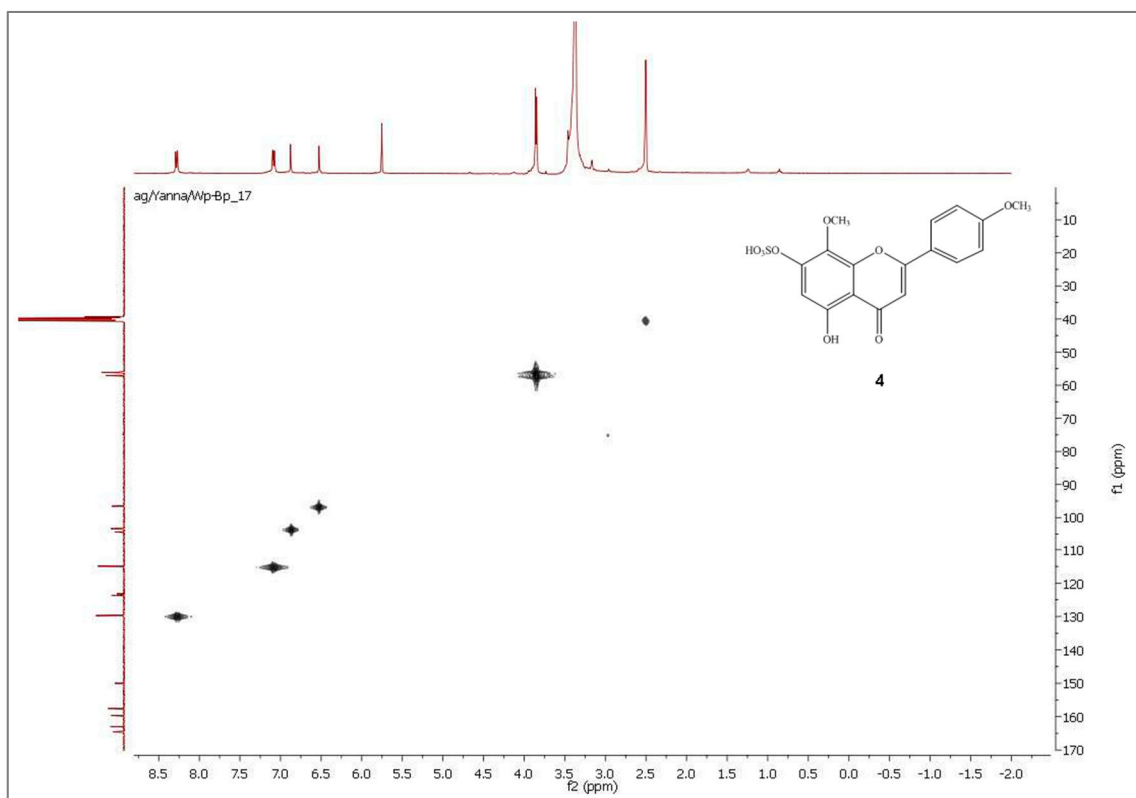

Figure S24. HMQC spectrum (<sup>1</sup>H-NMR: 400 MHz, <sup>13</sup>C-NMR: 100 MHz, DMSO) of 4.

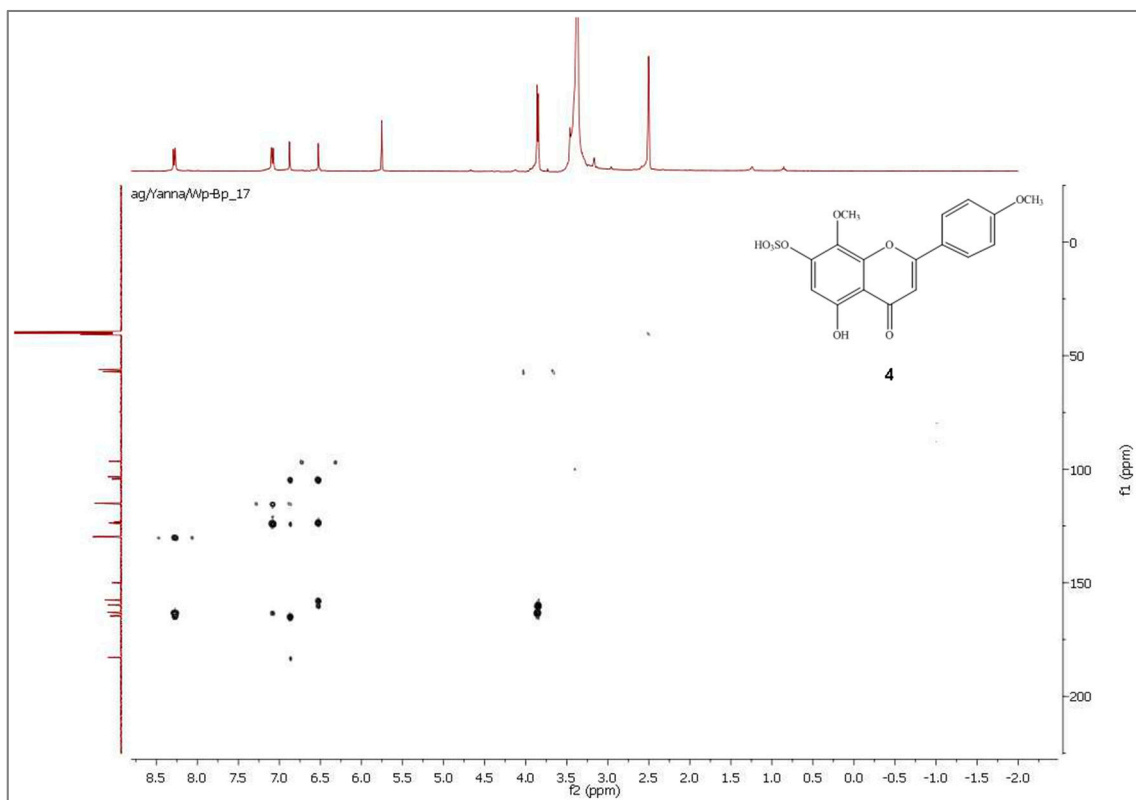

Figure S25. HMBC spectrum ( $^1\text{H-NMR}$ : 400 MHz,  $^{13}\text{C-NMR}$ : 100 MHz, DMSO) of 4.

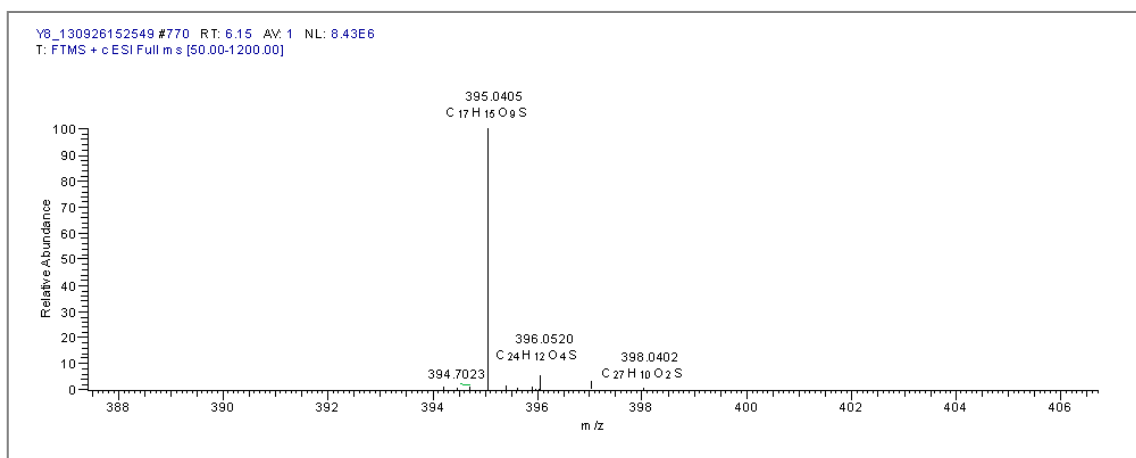

Figure S26. HRMS spectrum of compound 4.
